# Supplementary material for: Construction of Lightweight Multi-Dimensional Composites Based on MOF@RGO Derivatives for High-Efficiency Electromagnetic Wave Absorption
Source: Research Square preprint supplement (doi:10.21203/rs.3.rs-6692339/v1), 2025-06-12
Supplement: Supplementary file 1 [file bfaea7c511946bc8f0a3146c.docx]

**Construction of Lightweight Multi-Dimensional Composites Based on MOF@RGO Derivatives for High-Efficiency Electromagnetic Wave Absorption**


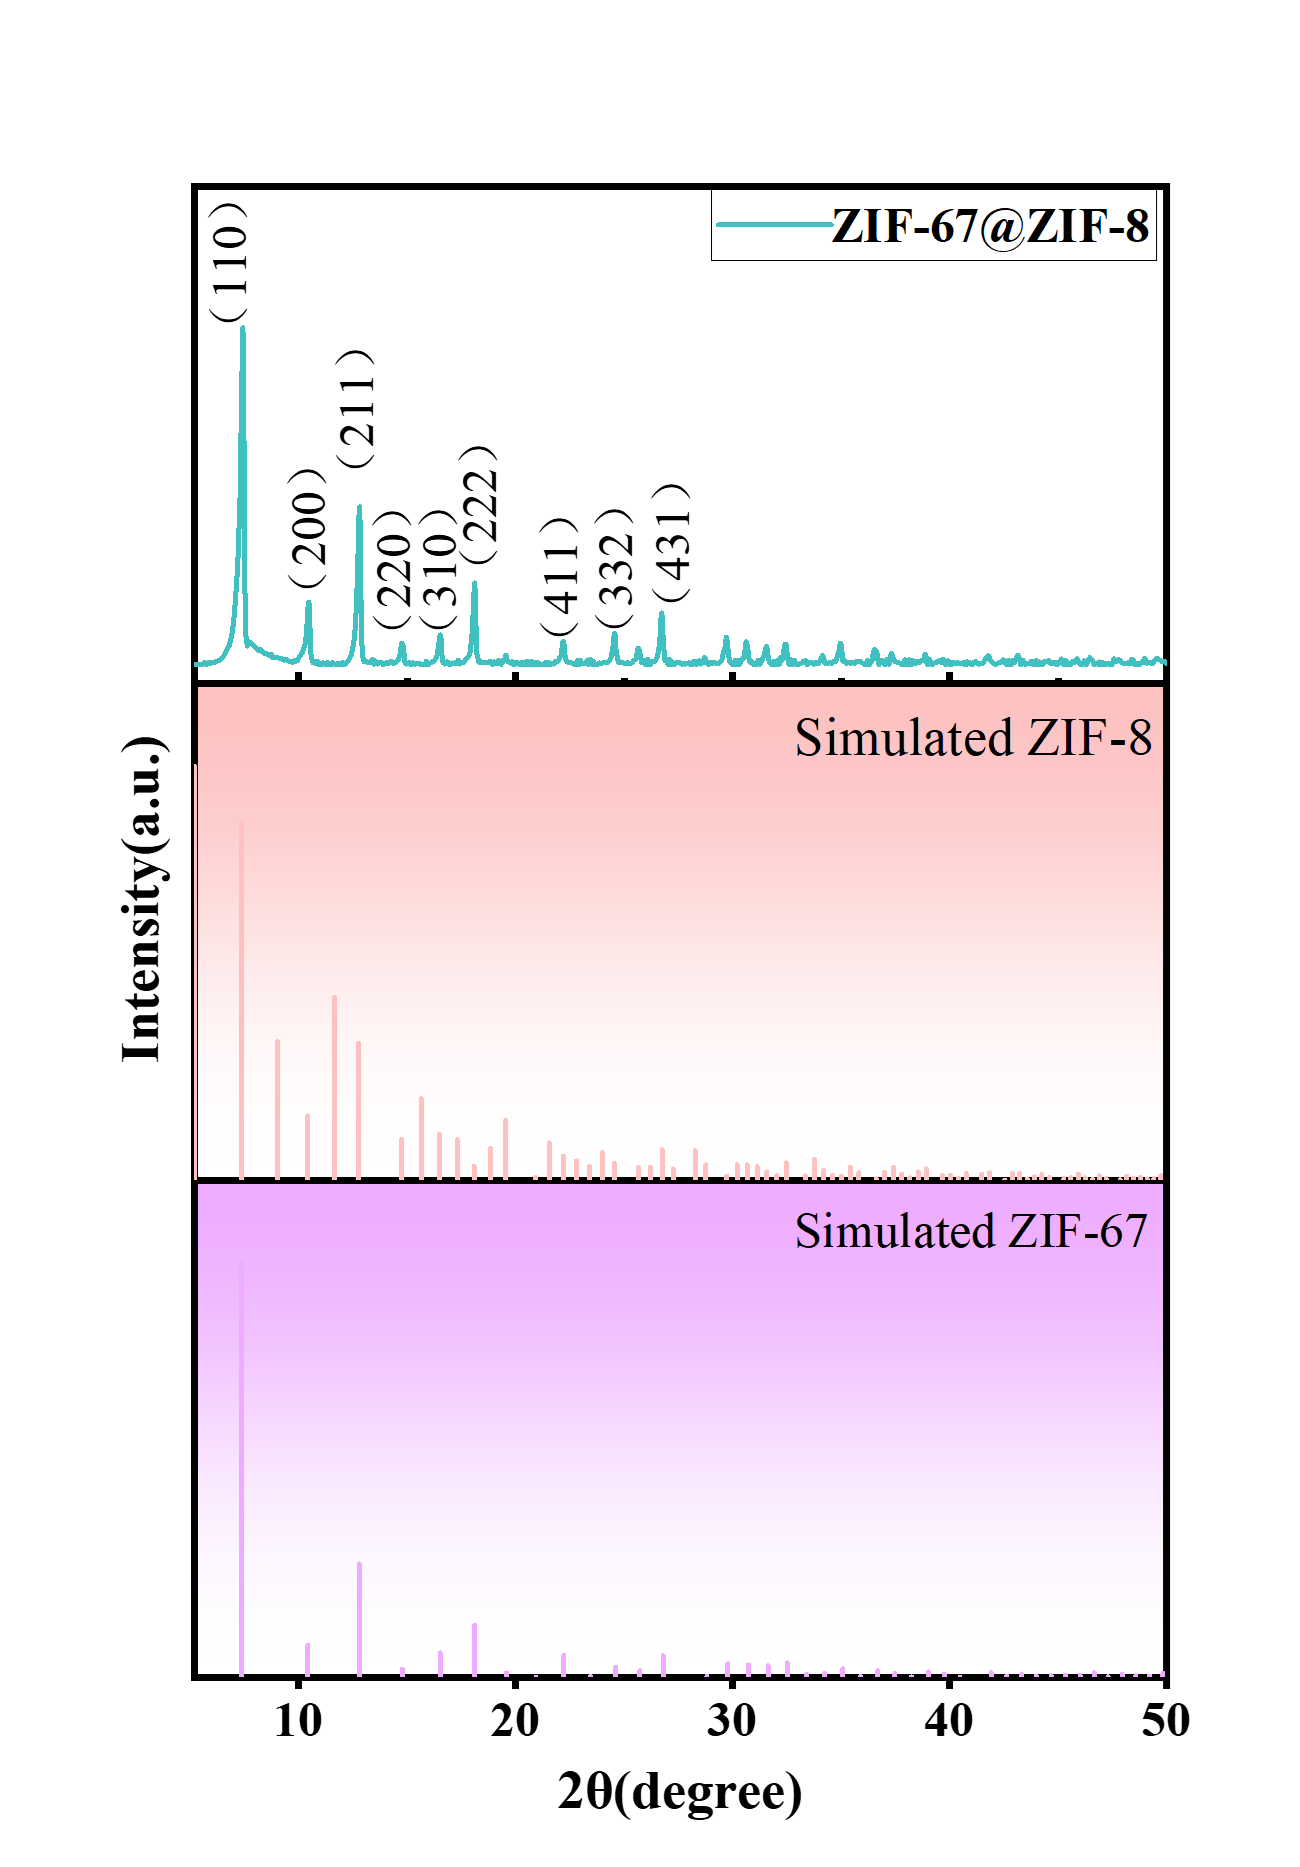


**Fig. S1** The XRD of ZIF-67@ZIF-8


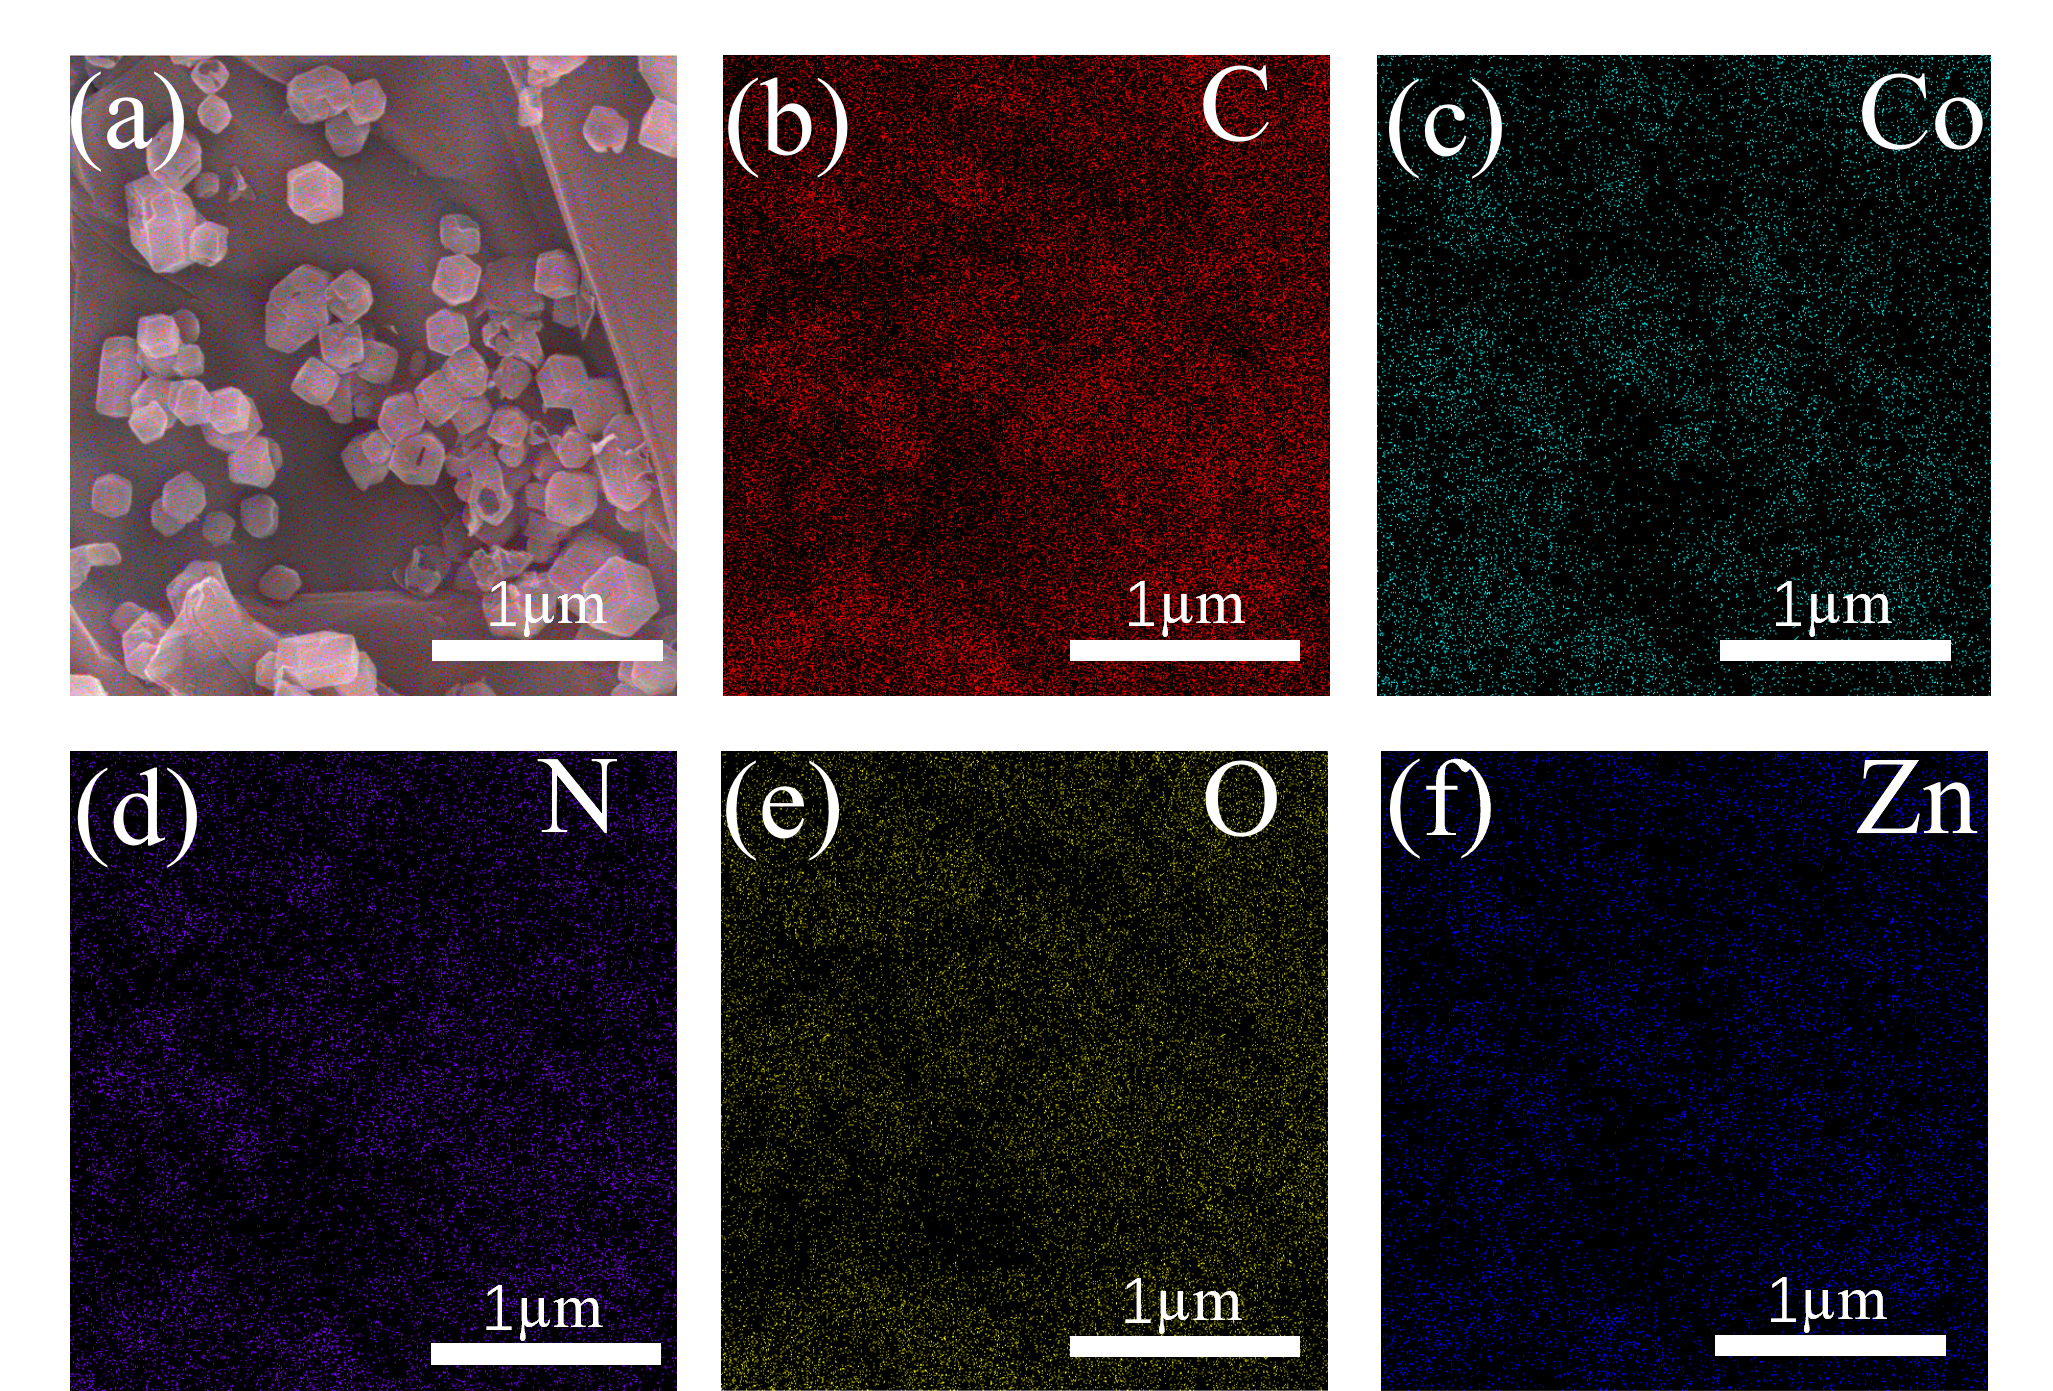


**Fig. S2** (a-f) EDS element mapping images of ZIF-67@ZIF-8/RGO


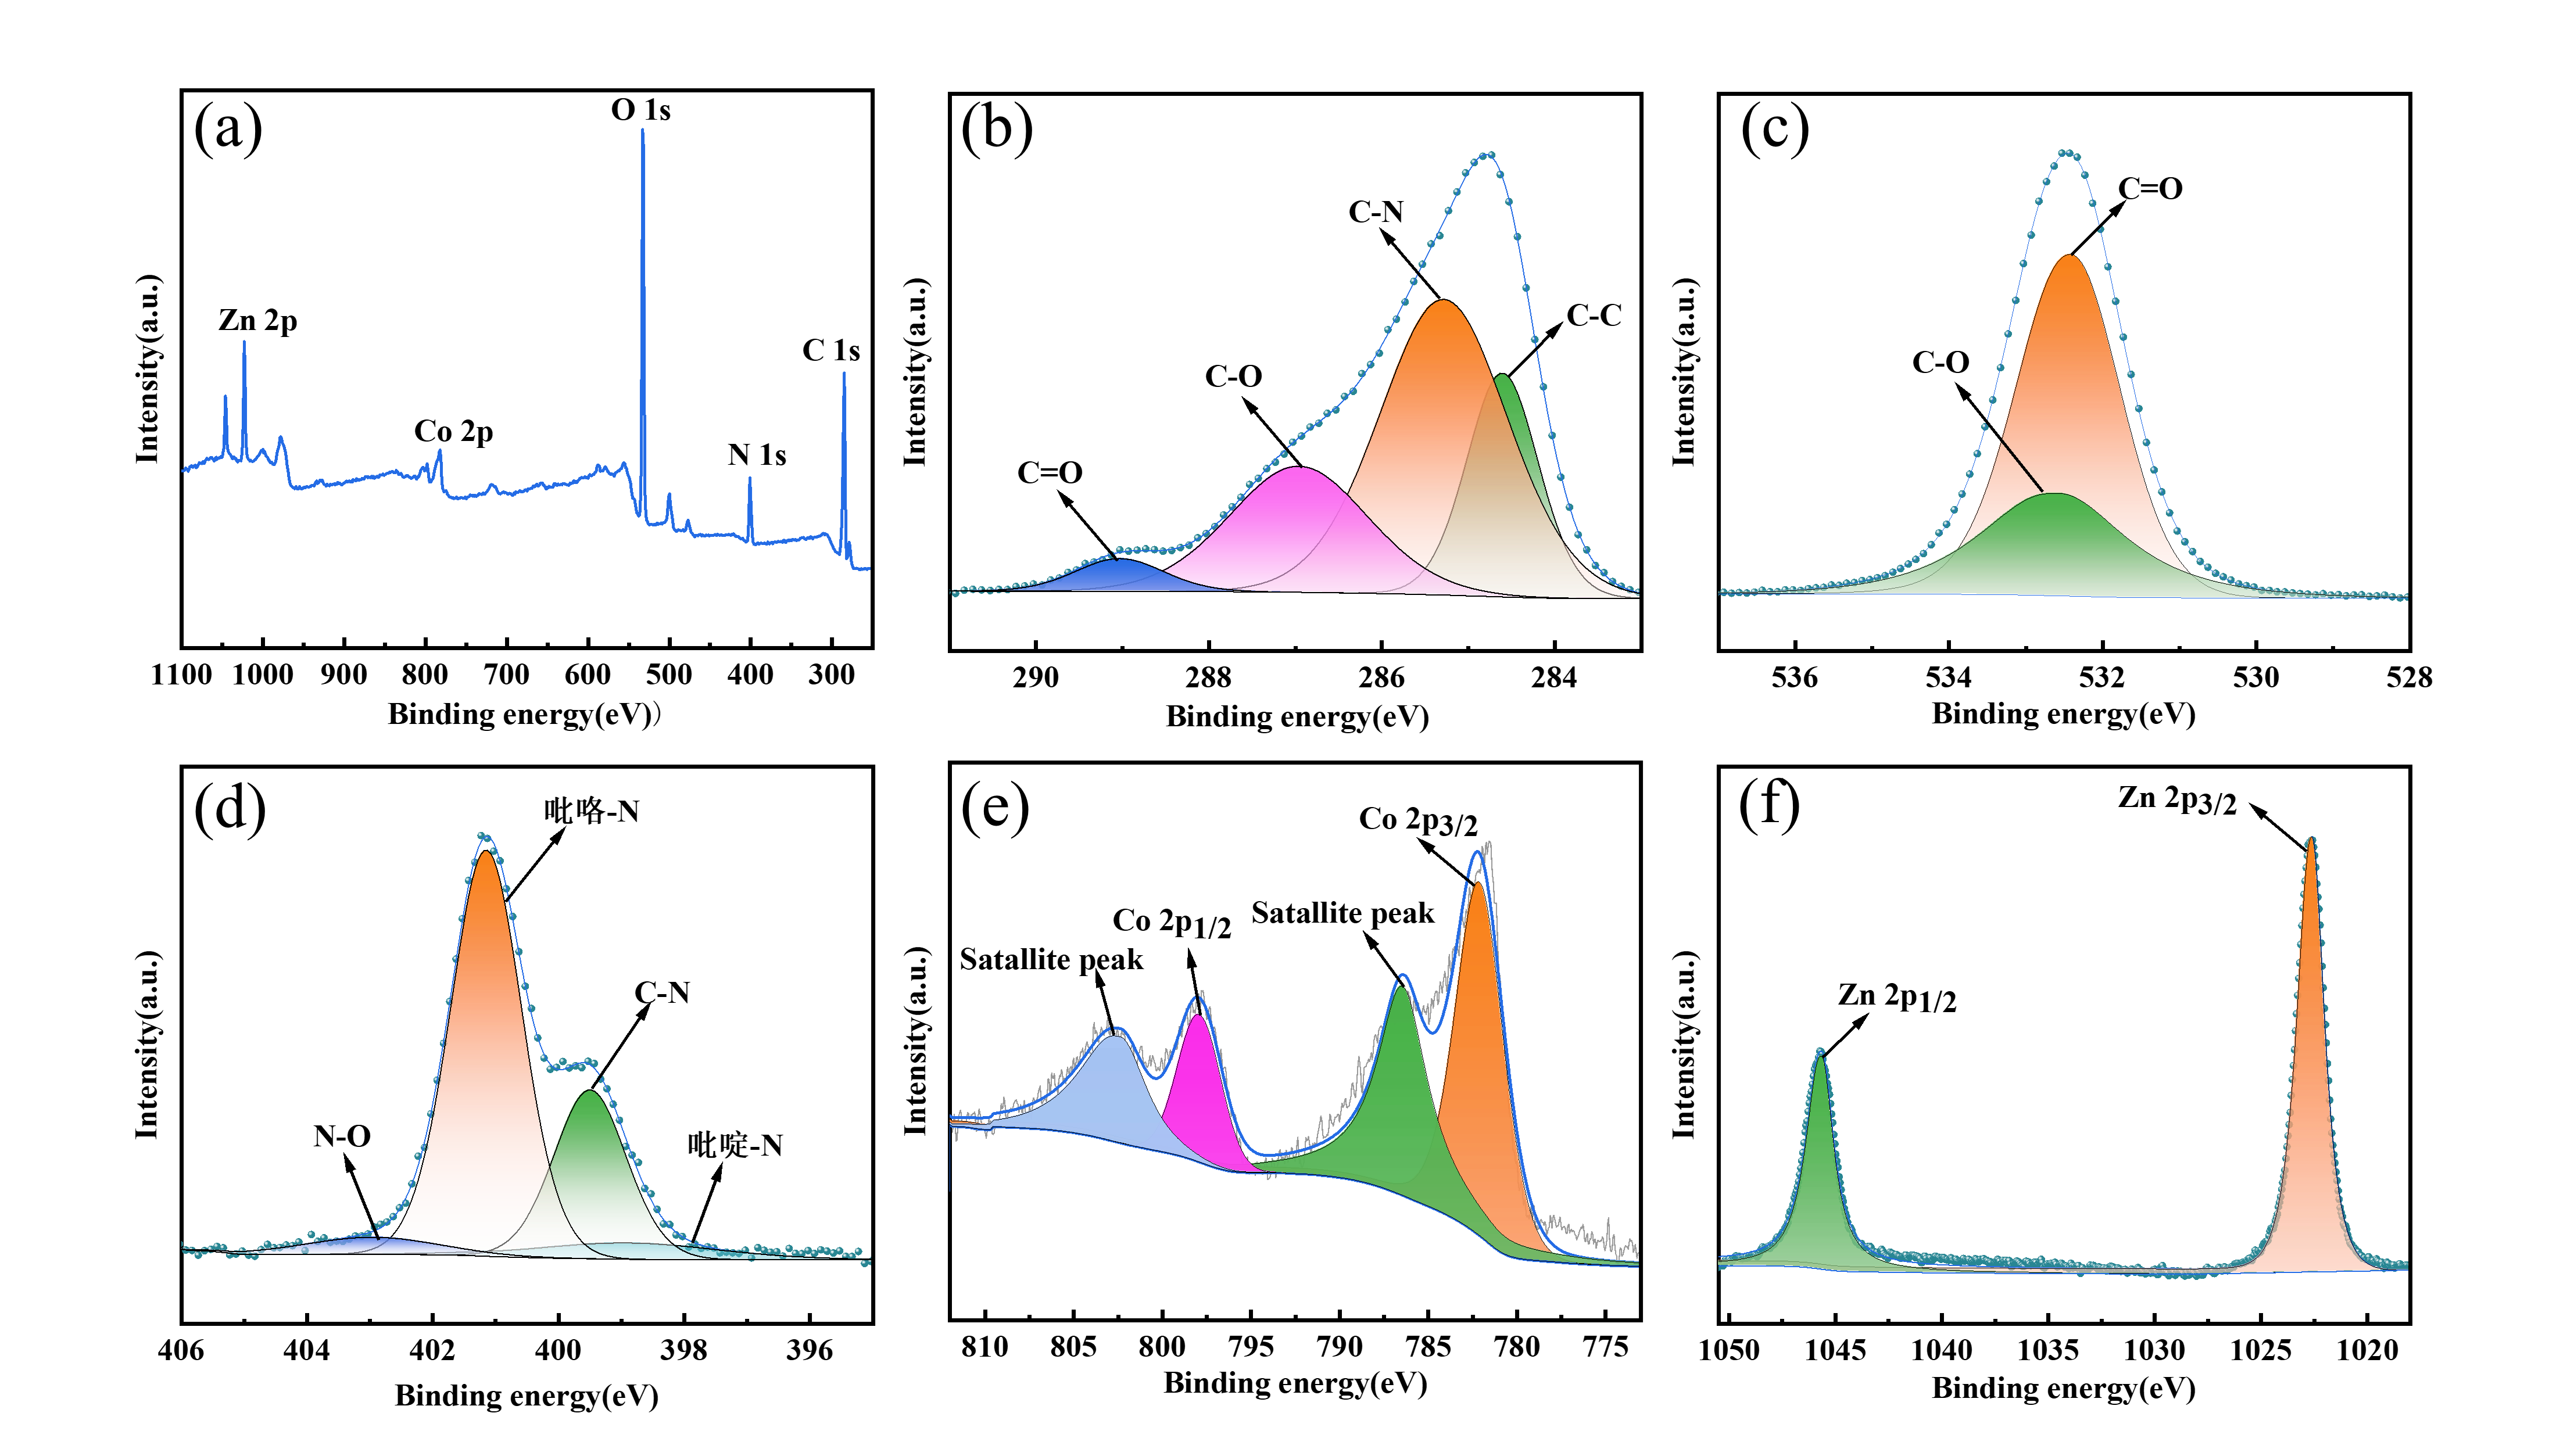


**Fig. S3** XPS profiles of ZIF-67@ZIF-8@GO: (a) total spectrum, (b) O 1s, (c) N 1s, (d) C 1s, (e) Co 2p, (f) Zn 2p


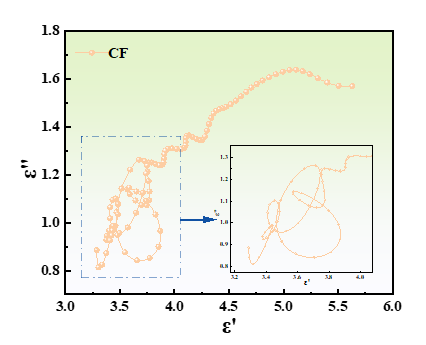


**Fig. S4** Cole-Cole semicircular curve of CF
